# Supplementary material for: Characterization of TCF21 Downstream Target Regions Identifies a Transcriptional Network Linking Multiple Independent Coronary Artery Disease Loci
Source: PubMed Central journal article supplement (PMC4447360; doi:10.1371/journal.pgen.1005202), 2015-05-28
Supplement: pgen.1005202.s003.pdf [file pgen.1005202.s003.pdf]

**Table S1. Representation of TCF21 ChIP-Seq peaks in regions of open chromatin.**

| Overlap between TCF21 ChIP-seq peaks and ATAC-Seq peaks   |                  |                                               |                                                     |                               |                 |
|-----------------------------------------------------------|------------------|-----------------------------------------------|-----------------------------------------------------|-------------------------------|-----------------|
| TCF21 Ab_shared peaks                                     | Overlapped peaks | No. ATAC-seq peaks (MACS fold-enrichment>200) | ATAC-seq background peaks (MACS fold-enrichment>50) | Enrichment P Value (Fisher's) | Fold Enrichment |
| 3619*                                                     | 2358             | 56193                                         | 159689                                              | <1.0e-300                     | 1.85            |
| Overlap between TCF21 ChIP-seq peaks and HAoSMC DHS peaks |                  |                                               |                                                     |                               |                 |
| TCF21 Ab_shared peaks                                     | Overlapped peaks | No. DHS peaks (P<0.05)                        | DHS background peaks                                | Enrichment P Value (Fisher's) | Fold Enrichment |
| 4852*                                                     | 4364             | 121731                                        | 580000                                              | <1.0e-300                     | 4.29            |

**\*Intersection of TCF21 Ab\_Shared peaks and ATAC-Seq background peaks identified 3619 overlap regions, intersection of TCF21 peaks with HAoSMC DNase hypersensitivity analyses identified 4852 overlap regions.**
